# Supplementary material for: Excited states of polonium(iv): electron correlation and spin–orbit coupling in the Po4+ free ion and in the bare and solvated [PoCl5]− and [PoCl6]2− complexes
Source: Royal Society of Chemistry journal article supplement (doi:10.1039/d3cp03317a), 2023-01-01
Supplement: d3cp03317a1.pdf [file d3cp03317a1.pdf]

Supporting Information for:

**“Excited states of polonium(IV): Electron correlation and spin-orbit coupling in the  $\text{Po}^{4+}$  free ion and in the bare and solvated  $[\text{PoCl}_5]^-$  and  $[\text{PoCl}_6]^{2-}$  complexes”**

by Zhutova *et al.*

Date of preparation: July 13, 2023

## 1 Molecular structures

All the structures have been obtained at the MP2/def2-TZVP level of theory (see main text for more details).

### 1.1 Gas phase structures

#### 1. $[\text{PoCl}_5]^-$ :

6

```
Po 0.00000 0.00000 0.00000
Cl 0.00000 2.52599 0.00000
Cl 0.00000 0.00000 2.55781
Cl 2.18757 -1.26300 0.00000
Cl 0.00000 0.00000 -2.55781
Cl -2.18757 -1.26300 0.00000
```

#### 2. $[\text{PoCl}_6]^{2-}$ :

7

```
Po 0.00000 0.00000 0.00000
Cl 0.00000 0.00000 2.60400
Cl 0.00000 2.60400 0.00000
Cl 2.60400 0.00000 0.00000
Cl 0.00000 0.00000 -2.60400
Cl -2.60400 0.00000 0.00000
Cl 0.00000 -2.60400 0.00000
```

#### 3. $[\text{PoCl}_5(\text{H}_2\text{O})]^-$ :

9

```
Po -0.06000 -0.00000 0.01300
Cl -1.62200 1.79100 -0.84800
Cl -1.62200 -1.79100 -0.84800
Cl -0.85200 -0.00000 2.37400
Cl 1.81200 1.84600 0.23400
Cl 1.81200 -1.84600 0.23400
O 1.20700 0.00000 -2.09800
H 1.68900 -0.76800 -1.90300
H 1.68900 0.76800 -1.90300
```

4.  $[\text{PoCl}_5(\text{H}_2\text{O})_2]^-$  :

12

Po 0.22448 -0.02103 -0.02614  
Cl 1.21980 2.14485 0.91823  
O -1.23055 0.39504 1.95667  
H -2.17313 0.30679 1.64945  
H -1.05685 1.33640 2.11044  
O -3.56325 -0.06500 0.71412  
H -3.24727 -0.93499 0.41369  
H -3.30254 0.50556 -0.03347  
Cl -1.30851 -2.09078 -0.40216  
Cl 1.63513 -0.22515 -2.05509  
Cl -1.59506 1.45125 -1.24523  
Cl 1.77060 -1.40296 1.41302

5.  $[\text{PoCl}_6(\text{H}_2\text{O})]^{2-}$  :

10

Po 0.23500 0.00000 -0.00000  
Cl 2.05000 1.82600 -0.00000  
Cl 0.23000 0.00000 2.59300  
O -4.31900 -0.00000 0.00000  
Cl -1.62400 -1.87900 0.00000  
Cl 0.23000 -0.00000 -2.59300  
Cl -1.62400 1.87900 -0.00000  
Cl 2.05000 -1.82600 0.00000  
H -3.76600 -0.72800 0.00000  
H -3.76600 0.72800 -0.00000

## 1.2 Solvated structures (polarisable continuum model)

1.  $[\text{PoCl}_5]^-$  :

6

Po 0.00000 0.00000 0.20719  
Cl -0.00000 2.55845 0.29454  
Cl 0.00000 0.00000 -2.20194  
Cl -2.55845 0.00000 0.29454  
Cl -0.00000 -2.55845 0.29454  
Cl 2.55845 -0.00000 0.29454

2.  $[\text{PoCl}_6]^{2-}$  :

7

Po 0.00000 0.00000 0.00000  
Cl -0.00000 0.00000 2.58932  
Cl -0.00000 2.58932 -0.00000  
Cl 2.58932 0.00000 0.00000  
Cl -0.00000 -0.00000 -2.58932  
Cl -2.58932 0.00000 -0.00000  
Cl -0.00000 -2.58932 0.00000

3.  $[\text{PoCl}_5(\text{H}_2\text{O})]^-$ :

9

Po -0.00082 -0.00000 -0.03248  
Cl -2.57448 -0.00027 -0.11770  
Cl 0.00269 -2.55349 -0.33109  
Cl -0.02789 0.00005 2.47370  
Cl 0.00216 2.55347 -0.33116  
Cl 2.57505 0.00026 -0.06290  
O 0.02637 -0.00002 -2.40170  
H 0.11994 -0.78585 -2.89143  
H 0.11986 0.78584 -2.89141

4.  $[\text{PoCl}_5(\text{H}_2\text{O})_2]^-$ :

12

Po -0.20000 -0.00800 0.00900  
Cl -0.95800 2.29200 -0.86000  
O 1.34400 0.05600 -1.86400  
H 2.29600 0.03300 -1.54800  
H 1.24200 0.86400 -2.39200  
O 3.73500 0.05400 -0.78400  
H 4.19200 -0.79400 -0.69800  
H 3.48800 0.30800 0.12100  
Cl 0.89500 -2.27100 0.52400  
Cl -1.78900 -0.06600 1.93500  
Cl 1.64800 1.15500 1.43300  
Cl -1.85900 -1.14700 -1.56200

5.  $[\text{PoCl}_6(\text{H}_2\text{O})]^{2-}$ :

10

Po -0.22200 -0.00000 -0.00400  
Cl -1.90300 1.81700 -0.68200  
Cl 0.76400 0.00000 -2.39000  
Cl 1.48200 -1.86400 0.68800  
Cl -1.17400 -0.00000 2.39700  
Cl 1.48200 1.86400 0.68900  
Cl -1.90300 -1.81700 -0.68300  
O 4.09600 -0.00000 -0.02600  
H 3.58500 -0.74500 0.11700  
H 3.58500 0.74400 0.11700

## 2 Supplementary tables

Table S1 Numerical compositions the excited energy levels expressed in terms of the spin-orbit free states, for the bare  $[\text{PoCl}_5]^-$  and  $[\text{PoCl}_6]^{2-}$  complexes in the gas phase, obtained at the c-SOCI/SC-NEVPT2 level.

| System                 | SPG      | Symmetry            | Composition                                        |
|------------------------|----------|---------------------|----------------------------------------------------|
| $[\text{PoCl}_5]^-$    | $D_{3h}$ | $A_1''$             | $81.3\% *^3 E' + 18.7\% *^3 A_2''$                 |
|                        |          | $A_2''$             | $86.9\% *^3 E' + 13.1\% *^1 A_2''$                 |
|                        |          | $E''$               | $48.2\% *^3 E' + 20.8\% *^3 A_2'' + 31.0\% *^1 E'$ |
|                        |          | $E''$               | $^3 E'$                                            |
|                        |          | $E'$                | $46.9\% *^3 E' + 3.3\% *^3 A_2'' + 49.8\% *^1 E'$  |
|                        |          | $A_1''$             | $18.7\% *^3 E' + 81.3\% *^3 A_2''$                 |
|                        |          | $E'$                | $4.9\% *^3 E' + 75.9\% *^3 A_2'' + 19.2\% *^1 E'$  |
| $[\text{PoCl}_6]^{2-}$ | $O_h$    | $A_{1u}$            | $13.1\% *^3 E' + 86.9\% *^1 A_2''$                 |
|                        |          | $T_{1u}$            | $^3 T_{1u}$                                        |
|                        |          | $T_{2u} \oplus E_u$ | $73.8\% *^3 T_{1u} + 26.2\% *^1 T_{1u}$            |
|                        |          | $T_{1u}$            | $^3 T_{1u}$                                        |
|                        |          | $T_{1u}$            | $26.2\% *^3 T_{1u} + 73.8\% *^1 T_{1u}$            |

Table S2 Numerical compositions the excited energy levels expressed in terms of the spin-orbit free states, for the bare  $[\text{PoCl}_5]^-$  and  $[\text{PoCl}_6]^{2-}$  complexes at the solvated geometries (polarisable continuum model), obtained at the c-SOCI/SC-NEVPT2 level.

| System                 | SPG      | Symmetry            | Composition                                    |
|------------------------|----------|---------------------|------------------------------------------------|
| $[\text{PoCl}_5]^-$    | $C_{4v}$ | $A_2$               | $68.6\% *^3 A_1 + 31.3\% *^3 E$                |
|                        |          | $E$                 | $74.8\% *^3 A_1 + 15.5\% *^3 E + 9.6\% *^1 E$  |
|                        |          | $A_1$               | $36.3\% *^3 E + 63.1\% *^1 A_1$                |
|                        |          | $A_2$               | $31.3\% *^3 A_1 + 68.7\% *^3 E$                |
|                        |          | $A_1$               | $62.9\% *^3 E + 36.7\% *^1 A_1$                |
|                        |          | $E$                 | $24.4\% *^3 A_1 + 59.3\% *^3 E + 16.3\% *^1 E$ |
|                        |          | $B_1 \oplus B_2$    | $^3 E$                                         |
| $[\text{PoCl}_6]^{2-}$ | $O_h$    | $E$                 | $0.6\% *^3 A_1 + 25.2\% *^3 E + 74.0\% *^1 E$  |
|                        |          | $A_{1u}$            | $^3 T_{1u}$                                    |
|                        |          | $T_{1u}$            | $73.9\% *^3 T_{1u} + 26.1\% *^1 T_{1u}$        |
|                        |          | $T_{2u} \oplus E_u$ | $^3 T_{1u}$                                    |
|                        |          | $T_{1u}$            | $26.1\% *^3 T_{1u} + 73.9\% *^1 T_{1u}$        |

Table S3 Spin character of the excited energy levels and excitation energies (in eV), for the  $[\text{PoCl}_5(\text{H}_2\text{O})]^-$  complex at the solvated geometry (polarisable continuum model), obtained at the c-SOCI/SC-NEVPT2 level.

| System                                  | SPG   | Composition                  | Energy |
|-----------------------------------------|-------|------------------------------|--------|
| $[\text{PoCl}_5(\text{H}_2\text{O})]^-$ | $C_1$ | triplet                      | 3.21   |
|                                         |       | triplet/singlet              | 3.28   |
|                                         |       | triplet/singlet              | 3.36   |
|                                         |       | triplet/singlet              | 3.37   |
|                                         |       | triplet                      | 5.14   |
|                                         |       | triplet/singlet              | 5.17   |
|                                         |       | triplet/singlet              | 5.20   |
|                                         |       | triplet/singlet              | 5.32   |
|                                         |       | triplet                      | 5.40   |
|                                         |       | triplet/singlet <sup>a</sup> | 5.41   |
|                                         |       | triplet/singlet              | 5.70   |
| triplet/singlet                         | 5.84  |                              |        |

<sup>a</sup> This energy level correlates with a pure spin-triplet energy level in the reference  $C_{4v}$  structure of the  $[\text{PoCl}_5]^-$  complex. Because of the symmetry lowering to  $C_1$ , some little spin-singlet character has emerged. This is not the case of the energy levels that are here indicated as “triplet” (for which no spin-singlet character was numerically observed).
